# Supplementary material for: Systematic total arch replacement with thoraflex hybrid graft in acute type A aortic dissection: A single centre experience
Source: PubMed Central journal article supplement (PMC9614841; doi:10.3389/fcvm.2022.997961), 2022-10-14
Supplement: Table_1.pdf [file Table_1.pdf]

**Table E1. Postoperative outcomes**

|                                         | <b>Penn Aa<br/>(n. 32)</b> | <b>Penn Ab<br/>(n. 21)</b> | <b>Penn Ac<br/>(n. 6)</b> | <b>Penn Abc<br/>(n. 7)</b> | <b>p<br/>value</b> |
|-----------------------------------------|----------------------------|----------------------------|---------------------------|----------------------------|--------------------|
| 30-days mortality                       | 0 (0)                      | 2 (9.5)                    | 2 (33)                    | 3 (43)                     | 0.001              |
| In-hospital mortality                   | 1 (3.1)                    | 2 (9.5)                    | 3 (50)                    | 3 (43)                     | 0.002              |
| Return to operating room                | 3 (9.4)                    | 1 (4.8)                    | 1 (17%)                   | 1 (14)                     | 0.5                |
| Low CO syndrome                         | 9 (28)                     | 8 (38)                     | 3 (50)                    | 4 (57)                     | 0.4                |
| Prolonged ventilation                   | 9 (28)                     | 11 (52)                    | 2 (33)                    | 4 (57)                     | 0.2                |
| Respiratory failure                     | 17 (53)                    | 14 (67)                    | 4 (67)                    | 4 (57)                     | 0.8                |
| Tracheostomy                            | 7 (22)                     | 6 (29)                     | 3 (50)                    | 3 (43)                     | 0.4                |
| Pericardial effusion requiring drainage | 12(38)                     | 2 (9.5)                    | 0 (0)                     | 1 (17)                     | 0.059              |
| Pleural effusion requiring drainage     | 9 (28)                     | 6 (29)                     | 1 (17)                    | 4 (67)                     | 0.3                |
| Deep sternal wound infection            | 4 (12)                     | 0 (0)                      | 2 (33)                    | 1 (14)                     | 0.068              |
| Recurrent laryngeal nerve palsy         | 4 (12)                     | 1 (4.8)                    | 1 (17)                    | 0 (0)                      | 0.7                |
| AKI requiring CVVH                      | 7 (22)                     | 7 (33)                     | 1 (17)                    | 5 (71)                     | 0.073              |
| Spinal cord injury/paraplegia           | 0 (0)                      | 1 (4.8)                    | 1 (17)                    | 0 (0)                      | 0.054              |
| Permanent CVA                           | 2 (6.2)                    | 1 (4.8)                    | 0 (0)                     | 0 (0)                      | >0.9               |
| Lower limb ischaemia                    | 1 (3.1)                    | 1 (4.8)                    | 0 (0)                     | 0 (0)                      | >0.9               |

*Group A: age at surgery <70 years; group B: age at surgery ≥ 70 years; ITU, Intensive Therapy Unit; LOS, Length of stay; CO, Cardiac Output; AKI, Acute Kidney Injury; CVVH, Continuous Veno-Venous Haemofiltration; CVA, Cerebro-Vascular Accident. Data are reported as mean (SD) for numerical variables and as count (%) for categorical variables.*
